# Supplementary material for: A novel electrolyte with the ability to form a solid electrolyte interface on the anode and cathode of a LiMn2O4/graphite battery
Source: Royal Society of Chemistry journal article supplement (doi:10.1039/c3ta13067c), 2013-01-01
Supplement: c3ta13067c.pdf [file c3ta13067c.pdf]

## Electronic Supplementary Information

### **A novel electrolyte with the ability to form a solid state interface on the anode and cathode of a LiMn<sub>2</sub>O<sub>4</sub>/graphite battery**

Bin Li<sup>a,d</sup>, Yaqiong Wang<sup>a</sup>, Haibo Rong<sup>a</sup>, Yating Wang,<sup>a</sup> Jiansheng Liu<sup>d</sup>, Lidan Xing<sup>a,b,c</sup>,

Mengqing Xu<sup>a,b,c</sup>, Weishan Li<sup>a,b,c,d\*</sup>

a. School of Chemistry and Environment, South China Normal University, Guangzhou 510006, China

b. Key Laboratory of Electrochemical Technology on Energy Storage and Power Generation of  
Guangdong Higher Education Institutes, South China Normal University, Guangzhou 510006, China

c. Engineering Research Center of Materials and Technology for Electrochemical Energy Storage  
(Ministry of Education), South China Normal University, Guangzhou 510006, China

d. College of Materials Science and Engineering, South China University of Technology, Guangzhou  
510641, China

---

\* Corresponding author.

Tel.: +86 20 39310256

fax: +86 20 39310256

E-mail address: liwsh@scnu.edu.cn

**Figure S1.** Cycling performance of  $\text{LiMn}_2\text{O}_4/\text{graphite}$  batteries in 1.0 M  $\text{LiPF}_6$  in EC-EMC (1:2) electrolytes without (base), with various contents of VC (A), and with various contents of PES (B) at room temperature. It can be found from Figure S1 that capacity retention of the batteries increases with increasing the content of the additives, reaches the maximum at 3 wt% for VC and 5 wt% for PES and decreases with increasing the content of the additive.

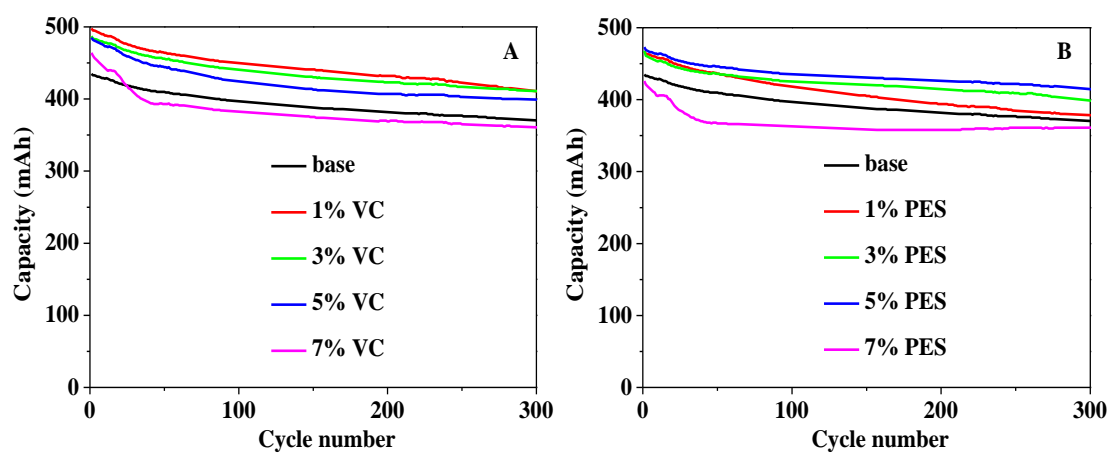

**Figure S2.** Cycling performance of  $\text{LiMn}_2\text{O}_4/\text{graphite}$  batteries in 1.0 M  $\text{LiPF}_6$  in EC-EMC (1:2) electrolytes without (base), with various contents of VC (A), and with various contents of PES (B) at  $60^\circ\text{C}$ . It can be seen from Figure S2 and Table 1 that the batteries using 3 wt% VC and 5% have the best performances after 150 cycles.

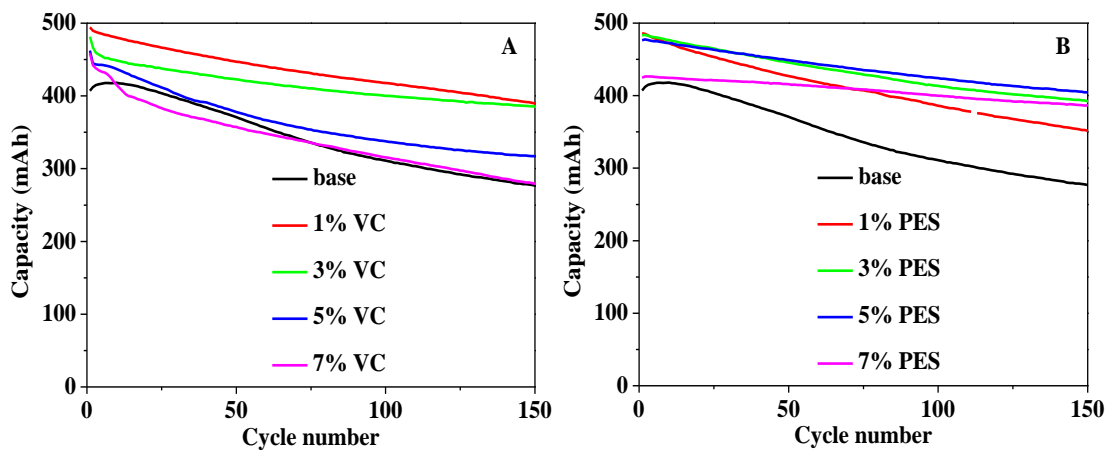

**Table S1.** Swell values of the batteries after 150 cycles with and without using additive.

| Solvent      | Additive | Swell value/% | Additive  | Swell value/% |
|--------------|----------|---------------|-----------|---------------|
| EC-EMC (1:2) | Base     | 36.4          |           |               |
|              | 1 wt% VC | 9.6           | 1 wt% PES | 26.7          |
|              | 3 wt% VC | 9.1           | 3 wt% PES | 4.6           |
|              | 5 wt% VC | 31.4          | 5 wt% PES | 3.4           |
|              | 7 wt% VC | 48.2          | 7 wt% PES | 4.0           |
|              |          |               |           |               |
